# Supplementary material for: Resveratrol-loaded biopolymer core–shell nanoparticles: bioavailability and anti-inflammatory effects
Source: Royal Society of Chemistry journal article supplement (doi:10.1039/d0fo00195c), 2020-01-01
Supplement: d0fo00195c1.pdf [file d0fo00195c1.pdf]

**Supplementary Table 1.** The cytotoxicity of blank zein/pectin nanoparticles

| Blank particle<br>concentration ( $\mu\text{g/mL}$ ) | Cell viability (%) |                |
|------------------------------------------------------|--------------------|----------------|
|                                                      | Caco-2             | RAW 264.7      |
| 8.4                                                  | 93.7 $\pm$ 3.6     | 94.7 $\pm$ 5.3 |
| 42.2                                                 | 95.1 $\pm$ 4.5     | 94.4 $\pm$ 3.8 |
| 84.3                                                 | 98.3 $\pm$ 1.5     | 96.3 $\pm$ 3.2 |
| 210.8                                                | 103.7 $\pm$ 5.5    | 96.4 $\pm$ 3.7 |
| 421.7                                                | 101.2 $\pm$ 2.4    | 94.6 $\pm$ 2.7 |
| 843.4                                                | 102.1 $\pm$ 4.3    | 96.2 $\pm$ 3.6 |
